# Supplementary material for: Antistaphylococcal Activity of Extracts, Fractions, and Compounds of Acacia polyacantha Wild (Fabaceae)
Source: Evid Based Complement Alternat Med. 2020 Mar 16;2020:2654247. doi: 10.1155/2020/2654247 (PMC7102469; doi:10.1155/2020/2654247)
Supplement: Supplementary Materials — RMN 1H, 13C, and major chemical shifts of studied compounds. [file 2654247.f1.doc]

Anti-staphylococcal activity of extracts, fractions and compounds of *Acacia polyacantha* wild (Fabaceae)

Fred A. Ashu1.2. Jean Na-Iya3. Brice E. N. Wamba1. Justin Kamga3. Paul Nayim1. Bathélémy Ngameni4. Veronique P. Beng2. Bonaventure T. Ngadjui3. Victor Kuete1*

*1Department of Biochemistry. Faculty of Science. University of Dschang. Dschang. Cameroon;*

*2Department of Biochemistry. Faculty of Science. University of Yaoundé I. Yaoundé. Cameroon;*

*3Department of Organic Chemistry. Faculty of Science. University of Yaoundé I. Yaoundé. Cameroon;*

*4Department of Pharmacognosy and Pharmaceutical Chemistry. Faculty of Medicine and Biomedical Science. University of Yaoundé I. Cameroon;*

*Author’s emails:*

*Fred A Ashu:* [*ashufred50@yahoo.com*](mailto:ashufred50@yahoo.com)*;*

*Jean Na-Iya:* [*jeannaiya2@gmail.com*](mailto:jeannaiya2@gmail.com)

*Brice E. N. Wamba:* [*wambaelvis@yahoo.fr*](mailto:wambaelvis@yahoo.fr)

*Justin Kamga:* [*kajuti55@yahoo.fr*](mailto:kajuti55@yahoo.fr)

*Paul Nayim:* [*nayimpaul@yahoo.fr*](mailto:nayimpaul@yahoo.fr)

*Bathélémy Ngameni:* [*bath_ngameni@yahoo.fr*](mailto:bath_ngameni@yahoo.fr)

*Veronique P. Beng:* [*v.penlap@yahoo.fr*](mailto:v.penlap@yahoo.fr)

*Bonaventure T. Ngadjui: ngadjuibt@yahoo.fr*

*Victor Kuete:* [*kuetevictor@yahoo.fr*](mailto:kuetevictor@yahoo.fr  )

**Corresponding author:**

**Tel: (+237) 677355927; E-mail:* [*kuetevictor@yahoo.fr*](mailto:kuetevictor@yahoo.fr)*; P.O. Box 1499 Bafoussam. Cameroon (Prof. Dr. Victor Kuete)*

***Compound 1***

**Stigmastérol** . C29H48O. White powder

RMN 13C (CDCl3. 150 MHz): 12.0 (C-29) ; 12.2 (C-24) ; 18.9 (C-28) ; 19.4 (C-27) ; 21.1 (C-26) ; 21.4 (C-11) ; 22.7 (C-22) ; 24.4 (C-15) ; 25.4 (C-23) ; 29.4 (C-16) ; 29.7 (C-25) ; 31.7 (C-7 et C-8) ; 31.9 (C-2) ; 36.5 (C-10) ; 37.2 (C-1) ; 39.7 (C-12) ; 40.6 (C-18) ; 42.2 (C-13) ; 42.3 (C-4) ; 50.2 (C-22) ; 51.2 (C-9) ; 55.9 (C-17) ; 56.8 (C-14) ; 71.8 (C-3) ; 121.7 (C-6) ; 129.3 (C-21) ; 138.3 (C-20) ; 140.7 (C-5) [1].

**RMN 13C (CDCl3. 150 MHz) of compound 1**

**RMN 1H (CDCl3. 600 MHz) of compound 1**

***Compound 2***

**β-amyrine.** C30H50O. White powder

RMN 13C (CDCl3. 150 MHz): 15.5 (C-25) ; 15.6 (C-24) ; 16.3 (C-26) ; 18.6 (C-6) ; 23.6 (C-11) ; 23.7 (C-30) ; 25.9 (C-27) ; 26.1(C-16) ; 26.2 (C-15) ; 26.6 (C-15) ; 27.2 (C-27) ; 28.0 (C-23) ; 28.4 (C-28) ; 31.0 (C-20) ; 32.5 (C-7) ; 32.6 (C-17) ; 33.8 (C-29) ; 34.7 (C-21) ; 36.9 (C-10) ; 37.1 (C-22) ; 38.6 (C-4) ; 38.8 (C-1) ; 39.8 (C-8) ; 41.7 (C-14) ; 46.8 (C-19) ; 47.2 (C-18) ; 47.6 (C-9) ; 55.2 (C-5) ; 79.0 (C-3) ; 121.7 (C-12) ; 145.2 (C-13) [2].

**RMN 13C (CDCl3. 150 MHz) of compound 2**

**RMN 1H (CDCl3. 600 MHz) of compound 2**

***Compound 3***

**3-*O*-méthyl-D-Chiro-inositol;** C7H14O6**.** White powder

RMN 13C (D2O. 150 MHz): 59.6 (MeO-) ; 69.7 (C-5) ; 70.5 (C-2) ; 71.4 (C-6) ; 71.6 (C-1) ; 72.0 (C-4) ; 82.7 (C-3) [3].

**RMN 1H (D2O. 150 MHz) of compound 3**

**RMN 1H (D2O. 600 MHz) of compound 3**

***Compound 4***

**Epicatechin;** C15H14O6 . Red powder

RMN 13C (DMSO-*d6*. 150 MHz): 28.6(C-4) ; 65.3(C-3) ; 78.5(C-2) ; 94.5(C-8) ; 95.5 (C-6) ; 98.9 (C-4a) ; 115.2 (C-2’) ; 115.3 (C-5’) ; 118.4 (C-6’) ; 131.0 (C-1’) ; 144.8 (C-4’) ; 144.9 (C-3’) ; 156.1 (C-8a) ; 156.6 (C-5) ; 156.9 (C-7) [4].

**RMN 1H (DMSO-*d6*. 150 MHz) of compound 4**

**RMN 1H (DMSO-*d6*. 600 MHz) of compound 4**

***Compound 5***

**quercetin-3-O-galactoside**. C21H20O12. Yellow powder

RMN 13C (DMSO-*d6*. 150 MHz): 60.6 (C-6”) ; 68.5 (C-4”); 71.5 (C-2”); 73.6 (C-3”); 76.3 (C-5”); 93.4 (C-8); 99.1 (C-6) ; 102.2 (C-1”);104.2 (C-4a) ; 115.6 (C-2’) ; 116.3 (C-5’); 121.5(C-1’) ; 122.4 (C-6’) ; 133.82 (C-3); 145.3 (C-3’) ; 148.9 (C-4’) ; 156.6 (C-8a) ; 156.7 (C-2) ; 161.6 (C-5) ; 164.7 (C-7) ; 177.7 (C-4) [5].

**RMN 13C (DMSO-*d6*. 150 MHz) of compound 5**

**RMN 1H (DMSO-*d6*. 600 MHz) of compound 5**

***Compound 6***

**3-O-[β-D-xylopyranosyl-(1→4)-β-D-galactopyranosyl]-oleanolic acid;** C41H66O12 . White powder

RMN 13C (CD3OD. 150 MHz): 14.5 (C-25) ; 15.6 (C-24) ; 16.3 (C-26) ; 17.9 (C-6) ; 22.6 (C-30) ; 22.7 (C-16) ; 23.1 (C-11) ; 25.0 (C-27) ; 25.6 (C-2) ; 27.1 (C-23) ; 27.4 (C-15) ; 30.2 (C-20) ; 32.2 (C-29) ; 32.4 (C-22) ; 32.6 (C-7) ; 33.5 (C-21) ; 36.5 (C-10) ; 38.4 (C-1) ; 38.7 (C-4) ; 39.2 (C-18) ; 41.3 (C-8) ; 41.5 (C-14) ; 45.8 (C-19) ; 46.2 (C-17) ; 47.6 (C-9) ; 55.6 (C-5) ; 60.6 (C-6’) ; 65.7 (C-5’’) ; 69.5 (C-4’’) ; 73.5 (C-2’’) ; 74.0 (C-2’) ; 74.6 (C-5’) ; 74.9 (C-3’) ; 76.4 (C-3’’) ; 79.5 (C-4’) ; 89.5 (C-3) ; 104.0 (C-1’’) ; 105.1 (C-1’) ; 122.2 (C-12) ; 143.8 (C-13) ; 180.5 (C-28) [6].

**RMN 13C (CD3OD. 600 MHz) of compound 6**

**RMN 1H (CD3OD. 600 MHz) of compound 6**

***Compound 7***

**3-O-[β-galactopyranosyl-(1→4)-β-D-galactopyranosyl]-oleanolic acid;** C42H68O13. White powder

RMN 13C (CD3OD. 150 MHz): 14.5 (C-25) ; 15.5 (C-24) ; 16.3 (C-26) ; 18.0 (C-6) ; 22.7 (C-30) ; 23.1 (C-16) ; 25.0 (C-11) ; 25.7 (C-27) ; 27.1 (C-2 et C-23) ; 27.4 (C-15) ; 32.2 (C-20) ; 32.4 (C-7) ; 32.6 (C-22 et C-29) ; 33.5 (C-21) ; 36.5 (C-10) ; 38.4 (C-4) ; 39.2 (C-1) ; 39.0 (C-8) ; 41.4 (C-18) ; 41.5 (C-14) ; 45.9 (C-17) ; 45.7 (C-9) ; 46.3 (C-19) ; 55.6 (C-5) ; 61.7 (C-6’) ; 70.1 (C-4’’) ; 70.4 (C-2’’) ; 74.9 (C-3’) ; 76.2 (C-3’’) ; 76.5 (C-2’) ; 77.0 (C-5’) ; 77.1 (C-5’’) ; 79.7 (C-4’) ; 90.1 (C-3) ; 103.1 (C-1’) ; 104.0 (C-1’’) ; 122.2 (C-12) ; 143.8 (C-13) ; 180.7 (C-28) [7].


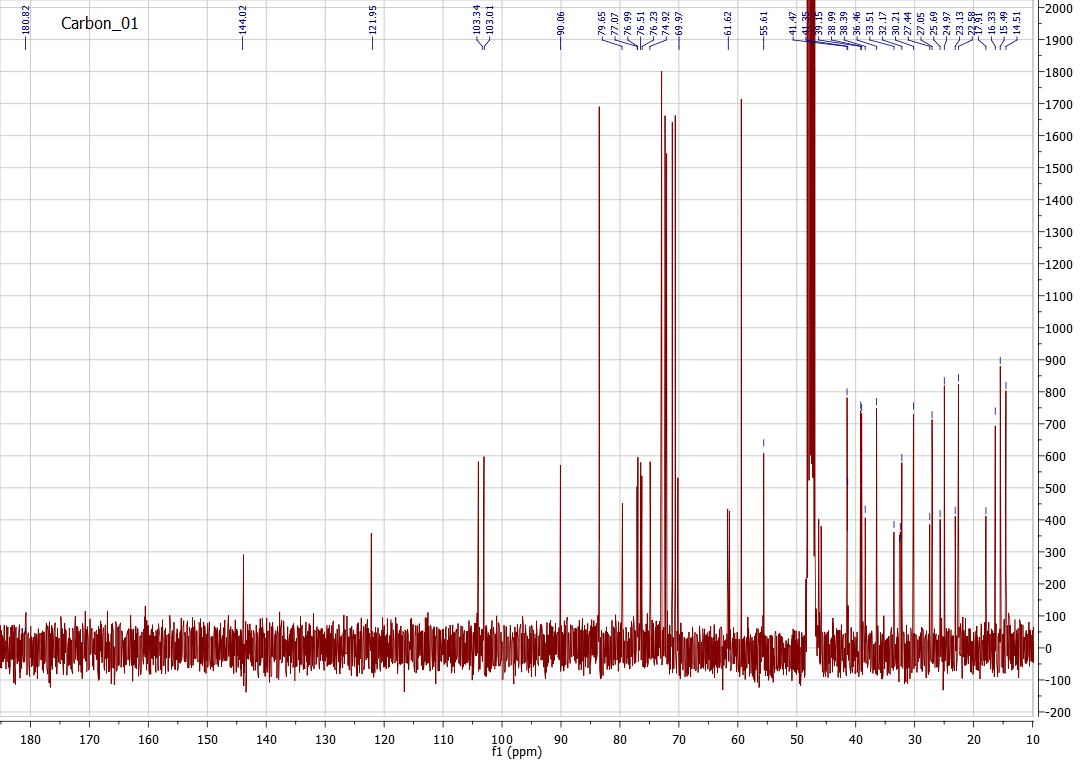


**RMN 13C (CD3OD. 600 MHz) of compound 7**


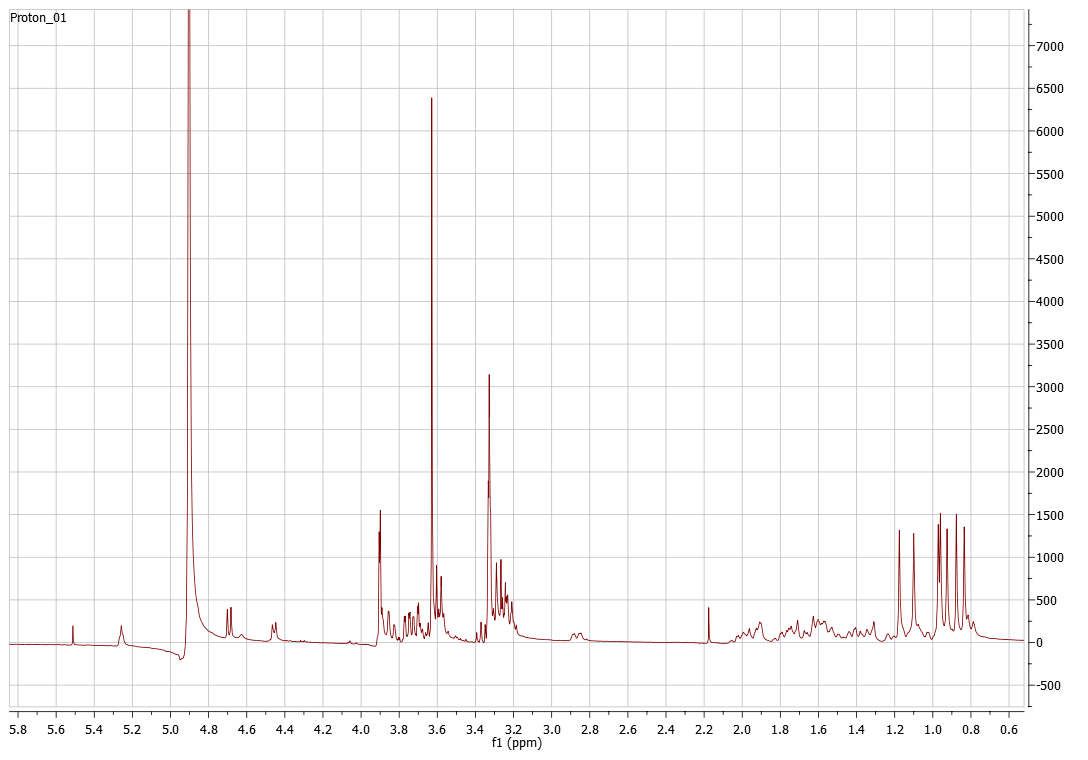


**RMN 1H (CCl3OD. 600 MHz) of compound 7**

***Compound 8***

**Lupeol.** C30H50O. White crystals

RMN 13C(CDCl3. 150 MHz): 14.5 (C-27). 15.3 (C-24). 15.9 (C-25). 16.1 (C-26). 18.0 (C-28). 18.3 (C-6). 19.3 (C-30). 20.9 (C-11). 25.1 (C-12). 27.4 ( C-2 et C-15). 28.0 (C-23). 29.7 (C-21). 34.3 (C-7). 35.6 (C-16). 37.1 (C-10). 38.0 (C-13). 38.7 (C-1). 40.8 (C-8). 48.0 (C-18). 50.4 (C-9). 55.3 (C-5). 79.0 (C-3). 109.3 (C-29). 150.9 (C-20) [8].


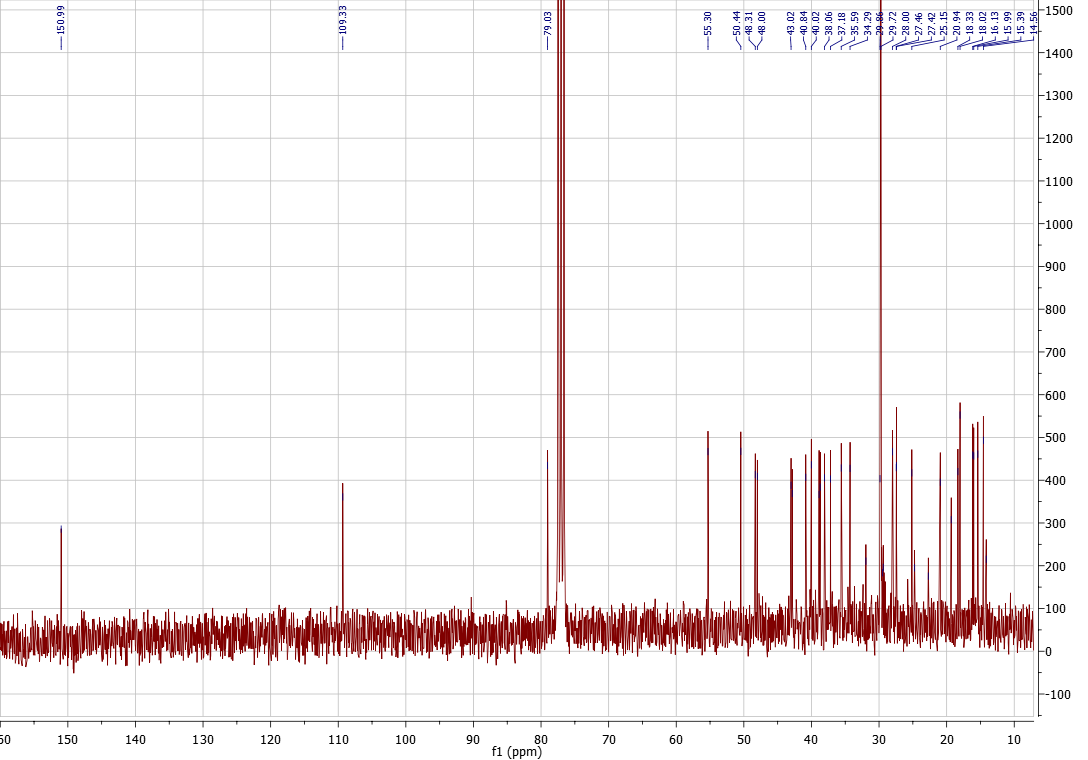


**RMN 13C (CD3Cl. 150 MHz) of compound 8**


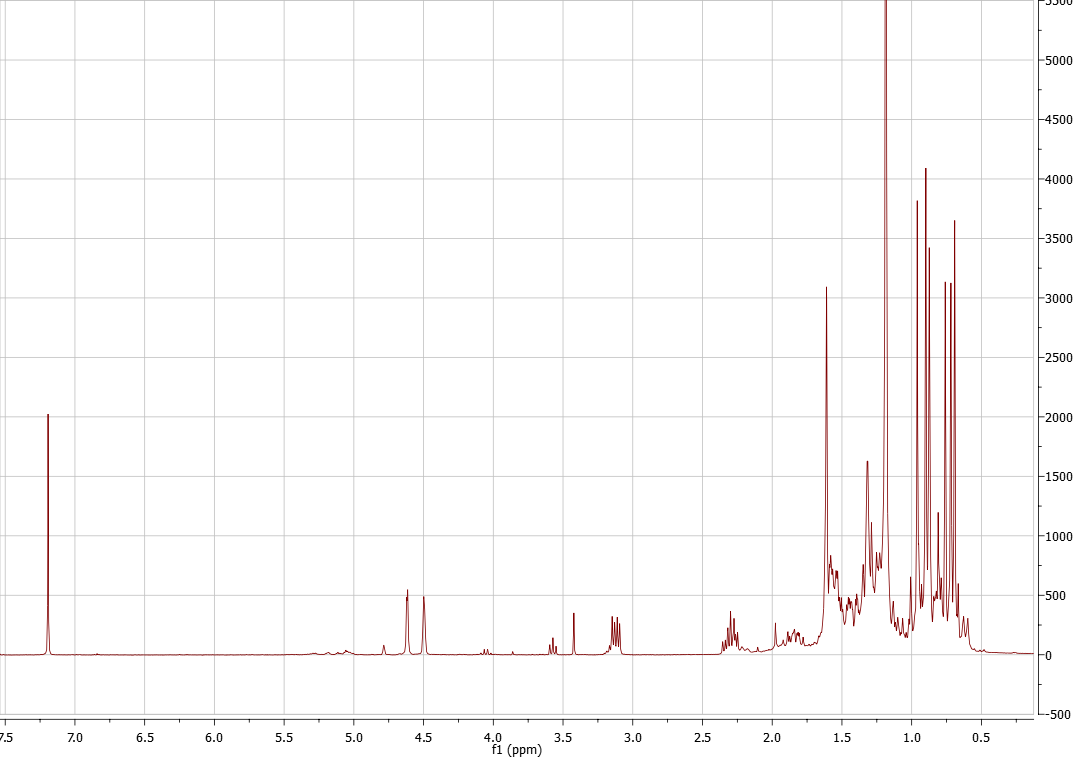


**RMN 1H (CD3Cl. 600 MHz) of compound 8**

***Compound 9***

**2.3-dihydroxypropyltetracosanoate.**  C27H54O4 (mp 86-88°C. m/z 465); White powder

RMN 13C (DMSO-*d6*. 150 MHz): 17.7 (C-24’) ; 26.5 (C-23’) ; 28.3 (C-3’) ; 30.1-33.5 (C-4’-C-21’) ; 35.4 (C-22’); 37.9 (C-2’) ; 67.0 (C-3) ; 68.1 (C-1) ; 73.8 (C-2) ; 178.2 (C-1’) [9].

**RMN 13C (DMSO-d6. 150 MHz) of compound 9**

**RMN 1H (CD3Cl. 600 MHz) of compound 9**

***Compound 10***

**Méthylgallate ;** C8H8O5. White powder;

RMN 13C (CD3OD. 150 MHz): 50.9 (Me-O) ; 108.6 (C-2 et C-6) ; 120.0 (C-1) ; 138.3 (C-4) ; 145.0 (C-3 et C-5) ; 167.6 (O=C) [9].

**RMN 13C (CD3OD. 150 MHz) of compound 10**

**RMN 1H (CD3OD. 600 MHz) of compound 10**

***REFERENCES***

[1] V. S. P. Chaturvedula. I. Prakash. “Isolation of stigmasterol and β-Sitosterol from the dichloromethane extract of *Rubus suavissimus.*” *International Current Pharmaceutical Journal*. 1: 239-242. 2012.

[2] S. B. Mahato. A. P Kundu. “13C NMR spectra of pentacyclic triterpenoids: A compilation and some salient features.” *Phytochemistry*. 37. 1517-1575. 1994.

[3] N. Sharma. M. K. Verma. D. K. Gupta. N. K. Satti. R. K. Khajuria. “Isolation and quantification of D-pinitol in *Argyrolobium roseum* *plant*. by 1H-NMR.” *Journal of Saudi Chemical Society*. 20: 81–87. 2016.

[4] I. K. Adnyana. Y. Tezuka. S. Awale. A. H. Banskota. K. Q. Tran. S. Kadota. “Quadranosides VI-XI. six new triterpene glucosides from the seeds of *Combretum quadrangulare*.” Chem. Pharm. Bull.. 48(8): 1114-1120. 2000.

[5] L. W. Xu. J. Chen. H. Y. Qi. Y. P. Shi. “Phytochemicals and their biological activities of plants in *Tagetes* L.” *Chinese Herbal Medicines*. 4 (2): 103-117. 2012.

[6] G. W. Fotso. J. Na-Iya. A. T. Mbaveng. P. A. Yves. I. Demirtas. V. Kuete. Y. Samuei. B. Ngameni. T. Efferth. B. T. Ngadjui. “Polyacanthoside A. a new oleanane-type triterpenoid saponin with cytotoxic effects from the leaves of *Acacia polyacantha* (Fabaceae)” *Natural Product Research*. 1-6. doi: 10.1080/14786419.2018.1486312. 2018.

[7] V. S. P. Chaturvedula. J. K. Schilling. J. S. Miller. R. Andreantsiferana. V. E. Rasamison. D. G. I. Kingston. “New cytotoxic oleanane saponins from the infrutescences of Polyscias amplifolia.” *Planta medica*. 69:440–449. 2003.

[8] G. W. Fotso. A. N. Ntumy. E. Ngachussi. M. Dube. R. Mapitse. G. D. W. F. Kapche. K. Andrae-Marobela. B. T. Ngadjui. B. M. Abegaz. Epunctanone. a new benzophenone and other secondary metabolites from *Garcinia epunctata* Stapf. (Guttiferae).” *Helv Chim Acta*. 97: 957-964. 2014.

[9] H. J. Lee. M. Khan. H. Y. Kang. D. H. Choi. P. Mi-Jin. L. Hyun-Jung. “Rare natural products from the wood of *Magnolia grandiflora.”* *Chemistry Natutral Compdounds*. 46: 243-244. 2000.

[10] J. G. Choi. O. H. Kang. Y. S. Lee. Y. C. Oh. H. S. Chae. H. J. Jang. D. W. Shin. D. Y. Kwon. “Antibacterial activity of methyl gallate isolated from galla rhois or carvacrol combined with nalidixic acid against nalidixic acid resistant bacteria” Molecules. 14: 1773-1780. doi:10.3390/molecules14051773. 2009.
